# Supplementary material
Source: PubMed Central journal article supplement (PMC7594134)
Supplement: ao0c03995_si_001.pdf [file ao0c03995_si_001.pdf]

# Fluorescent carbonized polymer dots prepared from sodium alginate based on CEE effect

Jianxin Sun <sup>1</sup>, Junke Yu <sup>1</sup>, Zhenjie Jiang <sup>1</sup>, Zhihui Zhao <sup>1,\*</sup> and Yanzhi Xia <sup>1,\*</sup>

1. State Key Laboratory of Bio-Fibers and Eco-Textiles, Shandong Collaborative Innovation Center of Marine Biobased Fibers and Ecological Textiles, Institute of Marine Biobased Materials, School of Material Science and Engineering, Qingdao University, Qingdao 266071, China; [2018025318@qdu.edu.cn](mailto:2018025318@qdu.edu.cn) (J.S.); [2017021033@qdu.edu.cn](mailto:2017021033@qdu.edu.cn) (J.Y.); [2018025301@qdu.edu.cn](mailto:2018025301@qdu.edu.cn) (Z.J.)

\* Correspondence: [zzh@qdu.edu.cn](mailto:zzh@qdu.edu.cn) (Z.Z.); [xiayz@qdu.edu.cn](mailto:xiayz@qdu.edu.cn) (Y.X.); Tel.: +86-532-85950962 (Z.Z.)

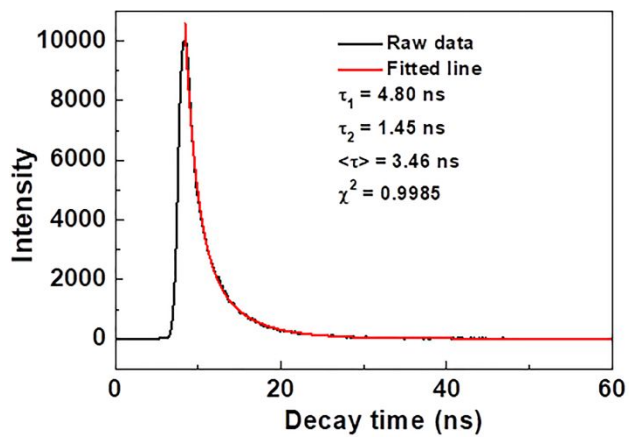

**Figure S1.** Fluorescent lifetime of SG-CPDs.

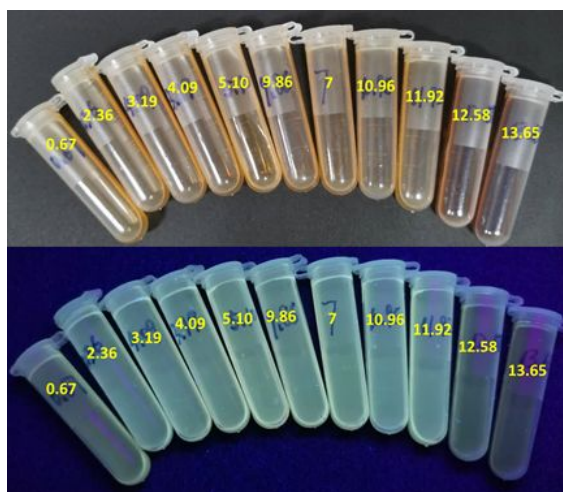

**Figure S2.** Photo of photoluminescence of SG-CPDs in different pH environments.

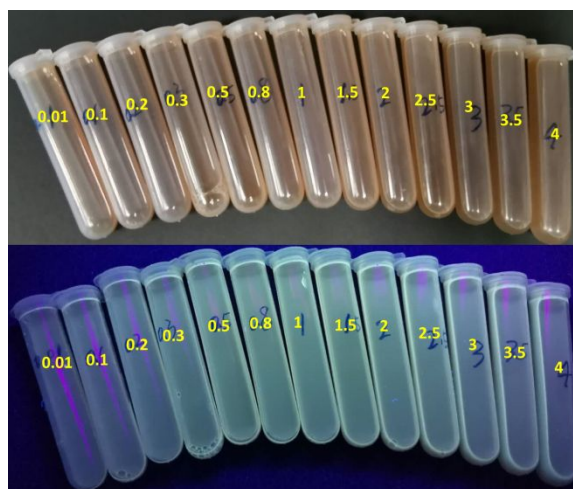

**Figure S3.** Photo of photoluminescence of SG-CPDs after adding calcium ion (mL).

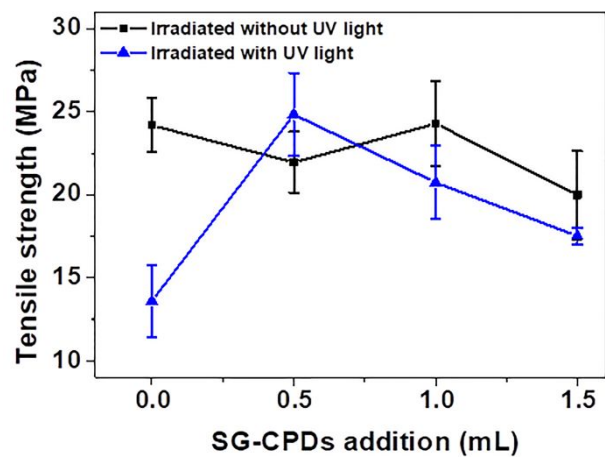

**Figure S4.** The relationship between the tensile strengths of the films and the amount of SG-CPDs in the film before and after irradiation.
